# Supplementary material for: Early Detection of Public Health Emergencies of International Concern through Undiagnosed Disease Reports in ProMED-Mail
Source: PubMed Central journal article supplement (PMC6986859; doi:10.3201/eid2602.191043), 2020-02
Supplement: 19-1043-Techapp-s1.pdf [file 19-1043-Techapp-s1.pdf]

# Early Detection of Public Health Emergencies of International Concern through Undiagnosed Disease Reports in ProMED-Mail

## Appendix

**Appendix Table.** Undiagnosed disease events in which diagnoses were later determined and list of diagnoses, by location (WHO zone), 2007–2018\*

| Category                                      | WHO zone                                                                         |                                                     |                                                                                          |                                        |                                                                                                             |                                                                                                                      |
|-----------------------------------------------|----------------------------------------------------------------------------------|-----------------------------------------------------|------------------------------------------------------------------------------------------|----------------------------------------|-------------------------------------------------------------------------------------------------------------|----------------------------------------------------------------------------------------------------------------------|
|                                               | AFRO                                                                             | PAHO                                                | EMRO                                                                                     | EURO                                   | SEARO                                                                                                       | WPRO                                                                                                                 |
| Undiagnosed disease events, n = 371, no. (%)† | 99 (27)                                                                          | 39 (11)                                             | 50 (13)                                                                                  | 17 (5)                                 | 118 (32)                                                                                                    | 50 (13)                                                                                                              |
| Disease events diagnosed, no./total no. (%)   | 40/99 (40)                                                                       | 12/39 (31)                                          | 15/50 (30)                                                                               | 2/17 (12)                              | 32/118 (27)                                                                                                 | 26/50 (52)                                                                                                           |
| Main diagnoses                                | Ebola (n = 5), meningitis (n = 4), yellow fever (n = 4), nodding disease (n = 4) | Leptospirosis (n = 2), Zika virus infection (n = 2) | Cholera (n = 2), dengue fever (n = 2), food poisoning (n = 2), Rift Valley fever (n = 2) | Hantavirus (n = 1), meningitis (n = 1) | Nipah virus infection (n = 6), chikungunya virus infection (n = 3), Crimean Congo hemorrhagic fever (n = 3) | Aflatoxin poisoning (n = 3); hand, foot and mouth disease (n = 3); leptospirosis (n = 3); methanol poisoning (n = 3) |

\*AFRO, African Regional Office; EMRO, Eastern Mediterranean Regional Office; EURO, Europe Regional Office; PAHO, Pan American Health Organization; SEARO, South-East Asia Regional Office; WHO, World Health Organization; WPRO, Western Pacific Regional Office.

†Two undiagnosed disease events were found in >1 WHO zone.

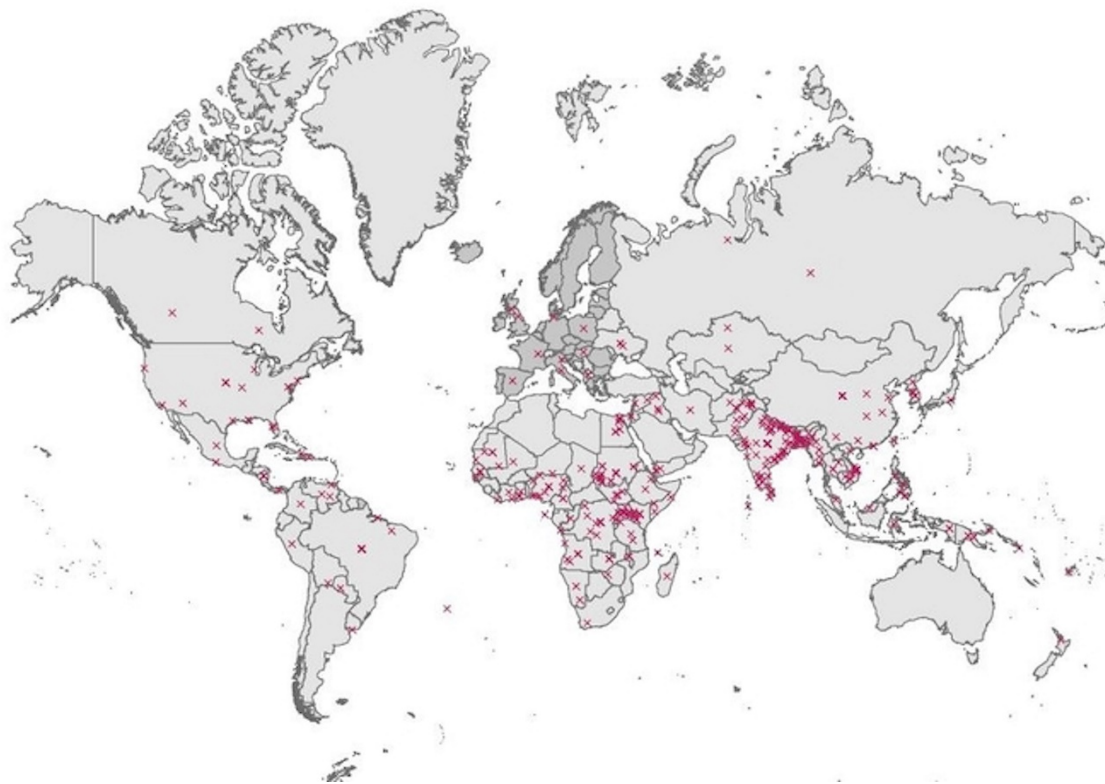

**Appendix Figure.** Geographic distribution of undiagnosed disease events posted in ProMED-mail from the 1 January 2007 to 14 June 2018 over the world.
